# Supplementary material for: Rhodioloside attenuated atherosclerosis progression by inhibiting VCAM-1 gene transcription mediated by p65 activation and CSN5 deubiquitination in endothelial cells
Source: Research Square preprint supplement (doi:10.21203/rs.3.rs-4633753/v1), 2024-08-01
Supplement: Supplementary file 1 [file 757f33908b6c1e3047794a89.docx]

(1) For the first time, to investigate the role of Rhodiroside in the pathological process of monocyte-endothelial cell adhesion, to consolidate the anti-AS pharmacology of Rhodiroside, to provide a theoretical basis and research strategy for the development of anti-AS drugs based on Rhodiroside, to clarify the anti-AS pharmacological action of Rhodiroside, and to enrich the connotation of Chinese medicine in the treatment of AS.

(2) For the second time, we discovered the role of CSN5-mediated protein deubiquitination in monocyte-endothelial cell adhesion process, explored potential new targets for anti-AS drug therapy, and provided new pipelines and pathways for clinical anti-AS drug development.

(3) For the third time, to reveal for the first time the crosstalk mechanism between NF-κB pathway and GATA-2 transcription factor, to deepen the fine regulatory network of NF-κB pathway, to enrich the molecular mechanism of monocyte-endothelial cell adhesion pathology, and to provide new directions for finding new anti-AS targets.
